# Supplementary material for: Fe3+-catalyzed degradation of organic mercury as a simple post-column interface for the speciation of mercury by high-performance liquid chromatography-catalytic cold vapor-atomic fluorescence spectrometry
Source: Royal Society of Chemistry journal article supplement (doi:10.1039/c9ja00432g), 2020-01-01
Supplement: c9ja00432g1.pdf [file c9ja00432g1.pdf]

## Electronic supplementary material

Fe<sup>3+</sup>-catalyzed degradation of organic mercury as a  
simple post-column interface for speciation of mercury  
in the high-performance liquid chromatography-catalytic  
cold vapor-atomic fluorescence spectrometry

Xiaolai Zhang <sup>a</sup>, Deluo Ji <sup>a</sup>, Yan Zhang <sup>a</sup>, Yong Lu <sup>a</sup>, Junhua Fu <sup>c</sup>, Zhenhua Wang <sup>b,\*</sup>

<sup>a</sup> College of Chemistry and Chemical Engineering, Shandong University, Jinan 250014, China.

<sup>b</sup> Shandong Analysis and Test Center, Qilu University of Technology (Shandong Academy of Sciences), Jinan 250014, China.

<sup>c</sup> Jinan Ecology and Environment Monitoring Center of Shandong Province, Jinan 250101, China.

\* Corresponding author.

E-mail addresses: wangzhz@qlu.edu.cn

Tel: +86-0531-68606173

**Fig. S1** The effect of  $\text{Fe}^{3+}$  concentration on the fluorescence signal in HPLC-CCV-AFS. Each mercury species was present at  $5 \mu\text{g L}^{-1}$ . Error bars show the standard deviation ( $n=3$ ).

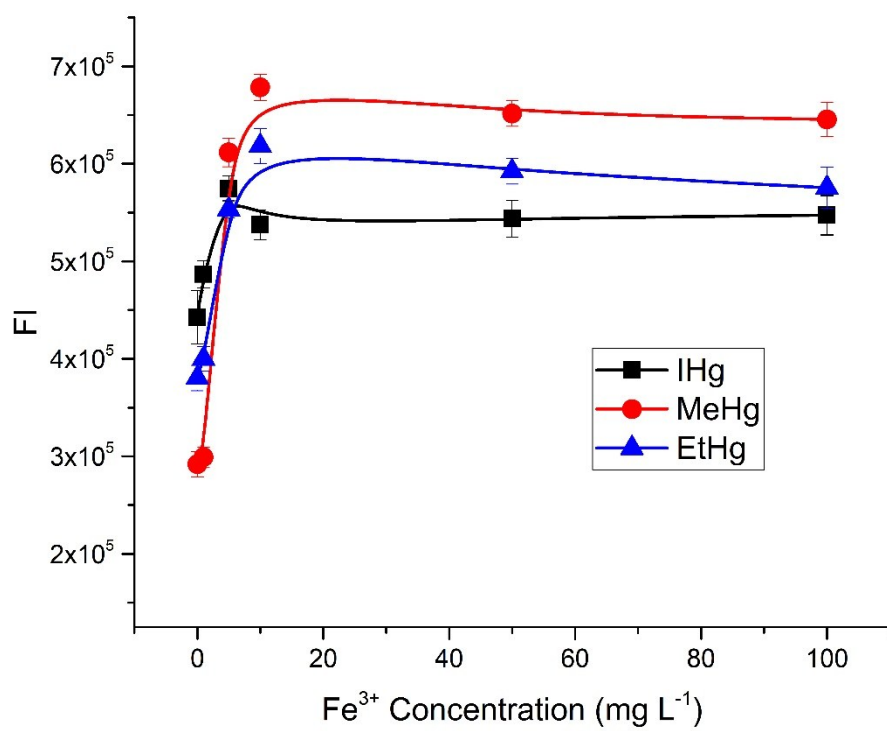

**Fig. S2** The effect of  $\text{Fe}^{3+}$  concentration on the fluorescence signal of organic mercury in FI-CCV-AFS. Each mercury species was present at  $5 \mu\text{g L}^{-1}$ . Other conditions were given in Table 1. Error bars show the standard deviation ( $n=3$ ).

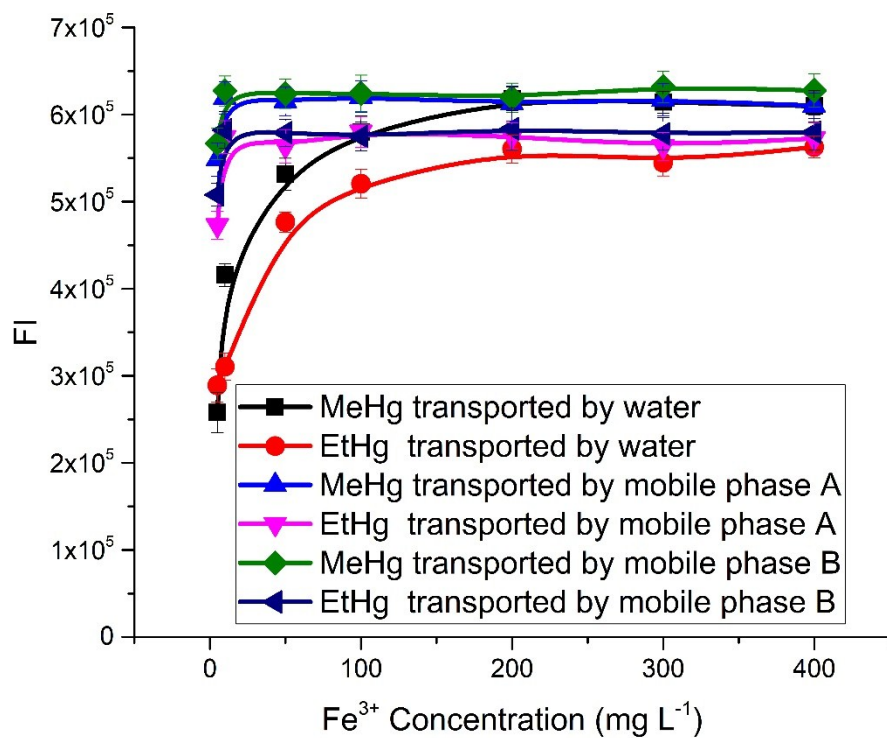

**Fig. S3** The effect of L-cysteine concentration on the fluorescence signal. Each mercury species was present at  $5\ \mu\text{g L}^{-1}$ . Other conditions were given in Table 1. The concentration of ammonium acetate was  $0.06\ \text{mol L}^{-1}$ . Error bars show the standard deviation ( $n=3$ ).

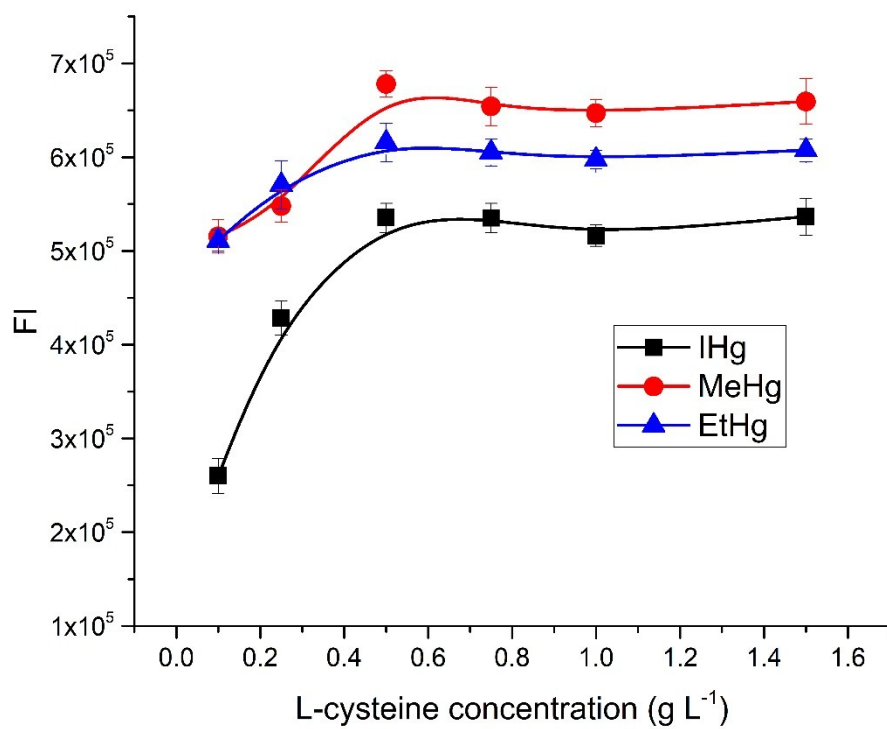

**Fig. S4** The effect of  $\text{NH}_4\text{Ac}$  concentration on the fluorescence signal. Each mercury species was present at  $5\ \mu\text{g L}^{-1}$ . The concentration of L-cysteine was  $0.5\ \text{g L}^{-1}$ . Error bars show the standard deviation ( $n=3$ ).

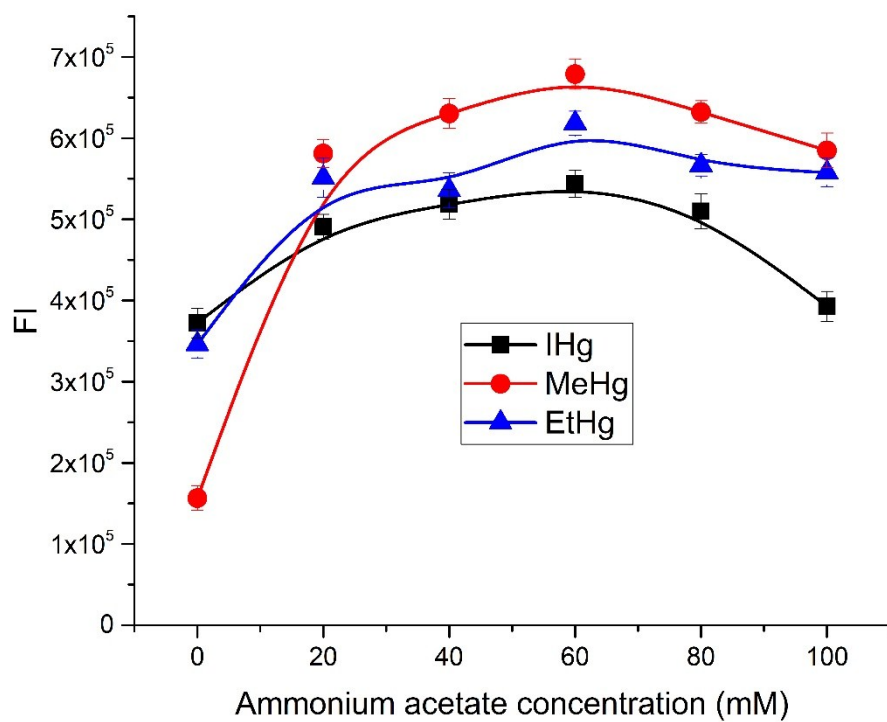

**Fig. S5** The effect of  $\text{KBH}_4$  concentration on the fluorescence signal. Each mercury species was present at  $5 \mu\text{g L}^{-1}$ . Other conditions were given in Table 1. The concentration of  $\text{HCl}$  was 10% (V/V). Error bars show the standard deviation ( $n=3$ ).

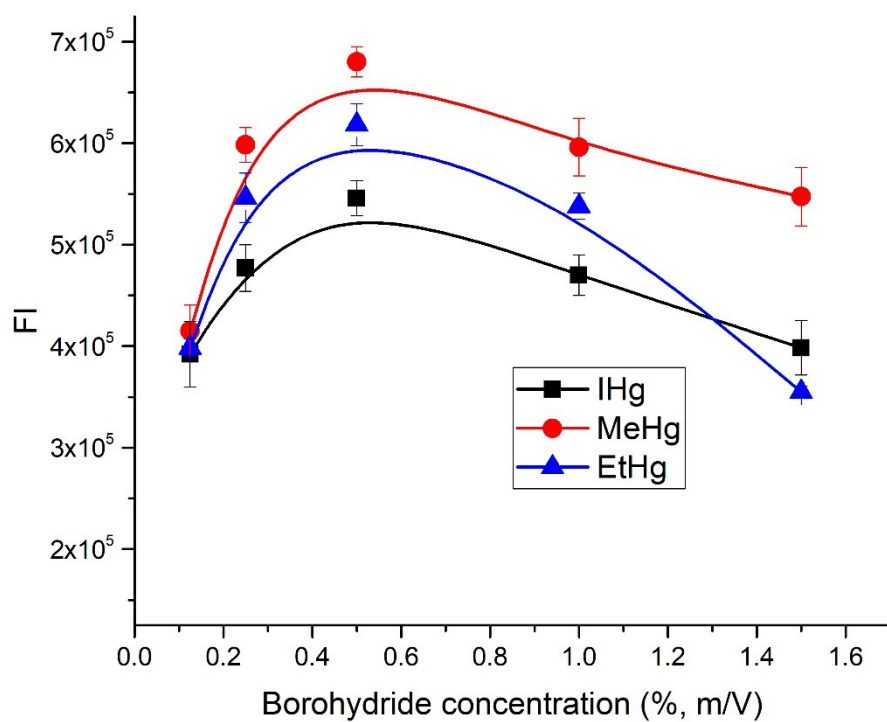

**Fig. S6** The effect of the HCl carrier on the fluorescence signal. Each mercury species was present at  $5\ \mu\text{g L}^{-1}$ . Other conditions were given in Table 1. The concentration of  $\text{KBH}_4$  was 0.5% (m/V). Error bars show the standard deviation ( $n=3$ ).

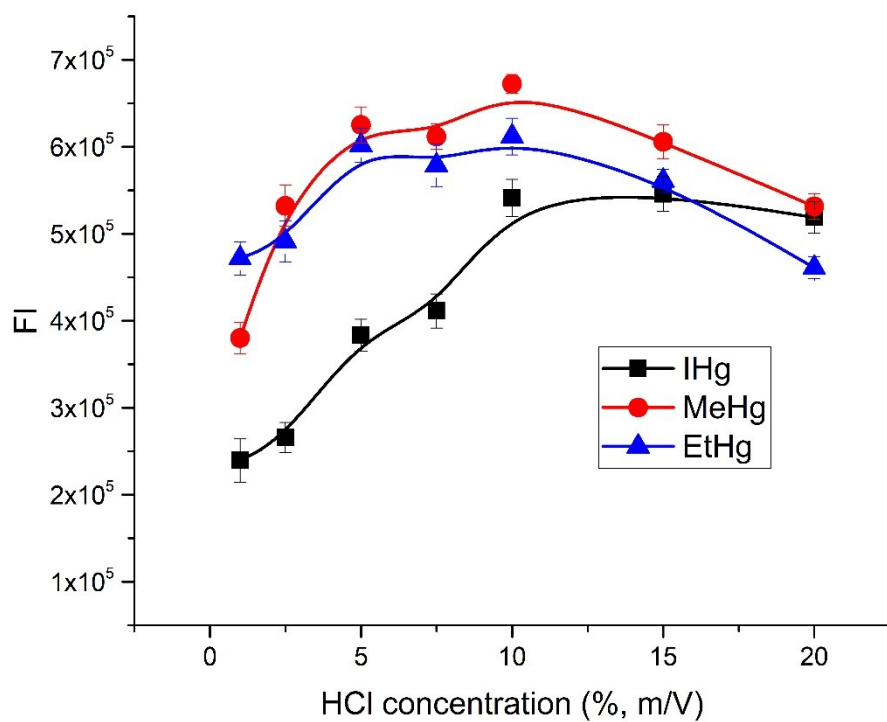

**Fig. S7** The effect of the carrier gas flow rate on the fluorescence signal. Each mercury species was present at  $5 \mu\text{g L}^{-1}$ . Other conditions were given in Table 1. Flow rate of the shielding gas was  $900 \text{ mL min}^{-1}$ . Error bars show the standard deviation ( $n=3$ ).

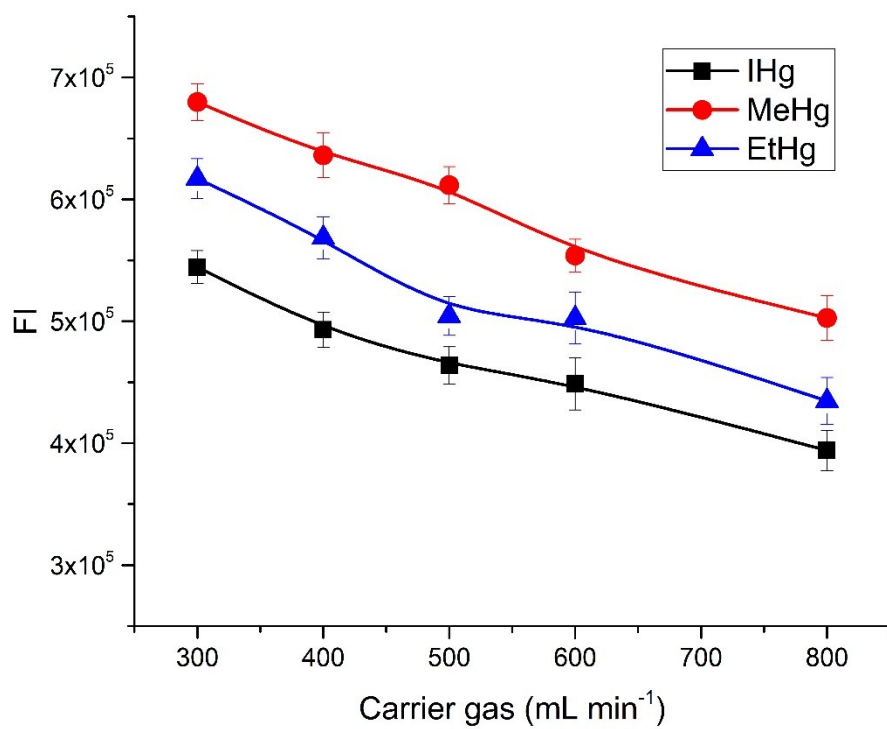

**Fig. S8** The effect of the shielding gas flow rate on the fluorescence signal. Each mercury species was present at  $5 \mu\text{g L}^{-1}$ . Other conditions were given in Table 1. Flow rate of the carrier gas was  $300 \text{ mL min}^{-1}$ . Error bars show the standard deviation ( $n=3$ ).

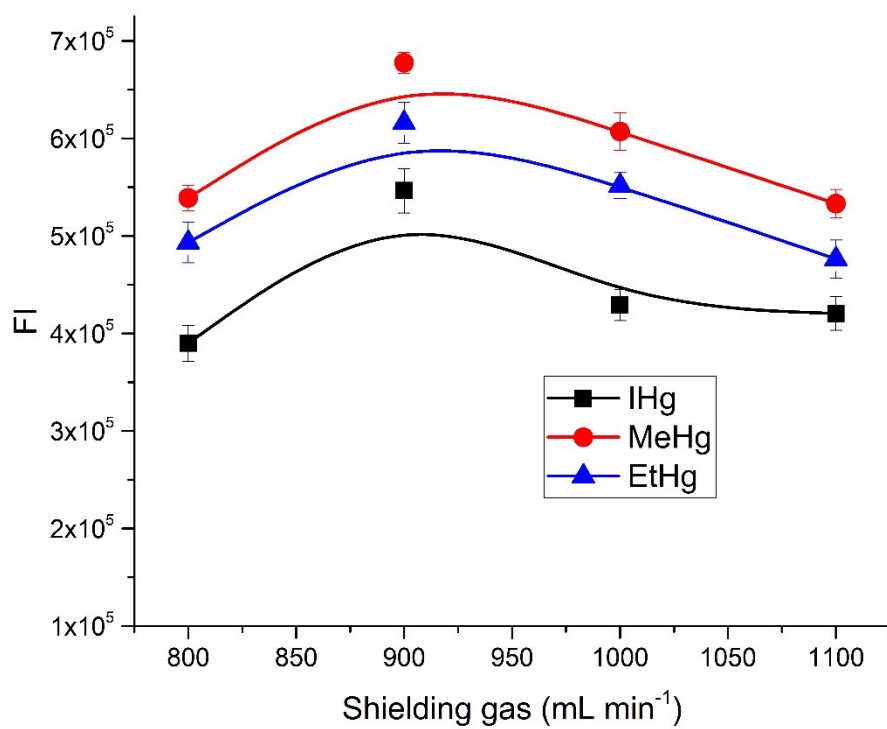

**Fig. S9** Typical chromatograms of mercury species. (1) HPLC-CCV-AFS with mobile phase A and  $\text{Fe}^{3+}$  catalyst. (2) HPLC-UV-CV-AFS with post-column oxidant and UV irradiation. (3) HPLC-CCV-AFS with mobile phase B and  $\text{Fe}^{3+}$  catalyst. Each mercury species was present at  $5 \mu\text{g L}^{-1}$ . Other conditions were given in Table 1.

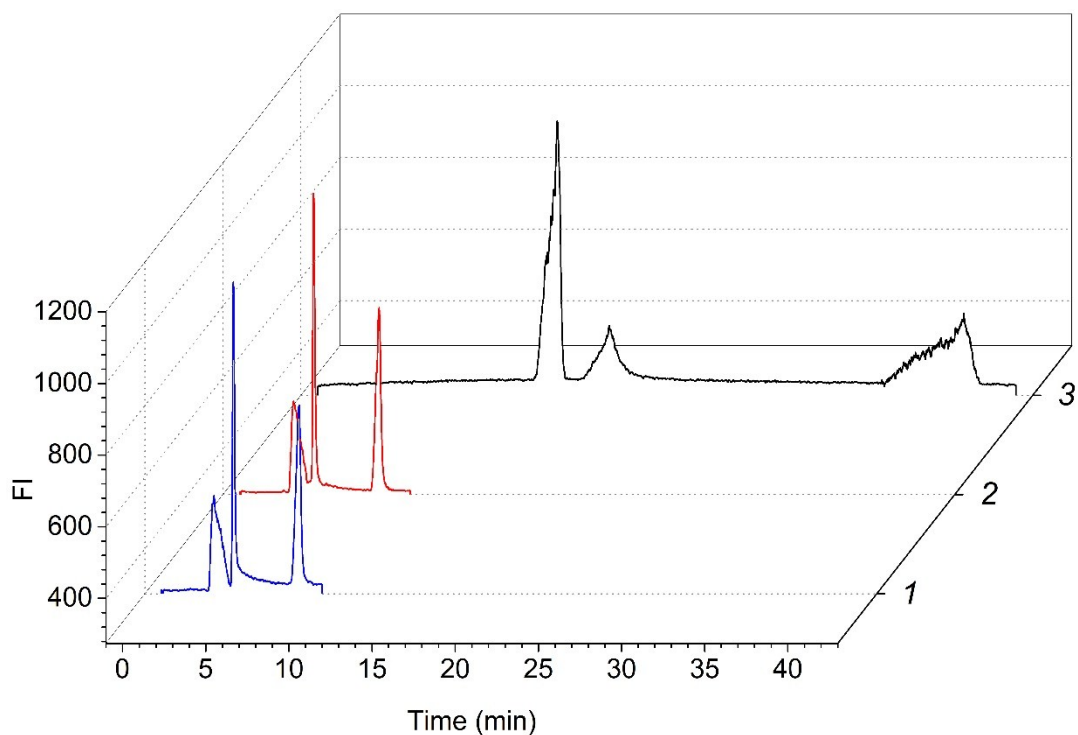

## References
